# Supplementary material for: Kaempferitrin: A Flavonoid Marker to Distinguish Camellia oleifera Honey
Source: MDPI journal article supplement (doi:10.3390/nu15020435), 2023-01-14
Supplement: s1 [file s1]

**Table S3.** Partial least-squares discriminant analysis (PLS-DA) results.

| No. | Compounds                             | VIP   | T. stat  | P. value | FDR     |
|-----|---------------------------------------|-------|----------|----------|---------|
| 1   | Kaempferitrin                         | 1.052 | -29.600  | 3.29e-4  | 6.37e-4 |
| 2   | Phloretin                             | 0.968 | 4.631    | 3.97e-2  | 4.49e-2 |
| 3   | Benzylideneacetophenone               | 1.053 | -42.172  | 2.83e-5  | 9.31e-5 |
| 4   | Naringenin chalcone                   | 1.053 | 43.423   | 9.80e-5  | 2.56e-4 |
| 5   | Narirutin                             | 1.054 | -160.400 | 1.53e-7  | 2.29e-6 |
| 6   | Hesperetin                            | 1.052 | -31.890  | 6.92e-4  | 1.09e-3 |
| 7   | Alpinetin                             | 1.050 | 23.945   | 1.40e-3  | 1.94e-3 |
| 8   | Pinocembrin                           | 1.052 | 34.742   | 1.47e-5  | 6.32e-5 |
| 9   | Hesperidin                            | 1.048 | -18.341  | 2.35e-3  | 2.88e-3 |
| 10  | Eriocitrin                            | 1.049 | -20.074  | 1.43e-3  | 1.94e-3 |
| 11  | Isosakuranetin                        | 0.749 | -2.022   | 0.14     | 0.13    |
| 12  | Liquiritigenin                        | 1.054 | -82.257  | 1.54e-6  | 1.03e-5 |
| 13  | Eriodictyol                           | 0.232 | 0.452    | 0.676    | 0.688   |
| 14  | Taxifolin                             | 1.048 | 18.913   | 1.74e-4  | 3.73e-4 |
| 15  | Dihydrokaempferol                     | 1.050 | 23.694   | 7.18e-5  | 2.06e-4 |
| 16  | Vitexin                               | 1.045 | 15.037   | 1.65e-3  | 2.20e-3 |
| 17  | Isoorientin                           | 1.039 | 11.548   | 2.03e-3  | 2.54e-3 |
| 18  | Orientin                              | 1.054 | -207.160 | 2.22e-5  | 8.34e-5 |
| 19  | Schaftoside                           | 1.027 | -8.586   | 1.75e-3  | 2.28e-3 |
| 20  | Sinensetin                            | 1.053 | -40.715  | 7.56e-5  | 2.06e-4 |
| 21  | Scutellarin                           | 1.053 | -51.971  | 1.02e-4  | 2.56e-4 |
| 22  | 4,5-Dihydroxyflavone                  | 1.054 | 66.881   | 2.83e-05 | 9.31e-5 |
| 23  | 5,7-Dihydroxy-3,4,5-trimethoxyflavone | 0.508 | -1.101   | 0.385    | 0.412   |
| 24  | Scutellarein tetramethyl ether        | 1.031 | -9.357   | 7.37e-3  | 8.67e-3 |
| 25  | Acacetin                              | 1.052 | -29.785  | 5.32e-4  | 9.07e-4 |
| 26  | Narcissin                             | 1.054 | 90.794   | 4.60e-7  | 4.05e-6 |
| 27  | Diosmin                               | 0.143 | 0.273    | 0.80     | 0.80    |
| 28  | Galangin                              | 1.045 | 15.063   | 1.16e-3  | 1.70e-3 |
| 29  | Nobiletin                             | 1.054 | -86.921  | 8.20e-7  | 6.15e-6 |
| 30  | Chrysin                               | 1.052 | 36.758   | 4.05e-4  | 7.36e-4 |
| 31  | Diosmetin                             | 1.053 | 49.631   | 1.35e-4  | 3.00e-4 |
| 32  | Jaceosidin                            | 1.024 | -8.226   | 8.66e-3  | 0.01    |
| 33  | Apigenin                              | 0.243 | -0.474   | 0.66     | 0.69    |
| 34  | Sakuranetin                           | 1.051 | -26.202  | 4.53e-4  | 8.00e-4 |
| 35  | Tangeretin                            | 1.052 | -34.087  | 2.20e-4  | 4.55e-4 |
| 36  | Nicotiflorin                          | 1.052 | 35.974   | 1.91e-5  | 7.65e-5 |
| 37  | Luteolin                              | 1.042 | -12.999  | 7.99e-4  | 1.23e-3 |
| 38  | Tectochrysin                          | 1.048 | 18.185   | 3.19e-4  | 6.37e-4 |

Continue for Table S3

| No. | Compounds                         | VIP   | T. stat  | P. value | FDR     |
|-----|-----------------------------------|-------|----------|----------|---------|
| 39  | Isorhamnetin-3-O-glucoside        | 1.054 | 135.690  | 4.73e-7  | 4.05e-6 |
| 40  | Isorhamnetin-3-O-neohesperidoside | 1.054 | 258.610  | 3.87e-9  | 2.32e-7 |
| 41  | 3,7-Di-O-methylquercetin          | 1.054 | 166.980  | 7.99e-9  | 2.40e-7 |
| 42  | Tiliroside                        | 1.053 | -37.463  | 1.23e-4  | 2.90e-4 |
| 43  | Spiraeoside                       | 1.054 | 134.540  | 2.03e-7  | 2.44e-6 |
| 44  | Laricitrin                        | 0.362 | -0.730   | 0.51     | 0.53    |
| 45  | Astragalin                        | 1.042 | 13.011   | 1.95e-3  | 2.50e-3 |
| 46  | Baimaside                         | 1.054 | 85.158   | 7.19e-5  | 2.06e-4 |
| 47  | Quercetin                         | 1.009 | 6.608    | 4.18e-3  | 5.01e-3 |
| 48  | Kaempferol-3-neohesperidoside     | 1.044 | 14.667   | 1.26e-4  | 2.90e-4 |
| 49  | Rutin                             | 1.053 | 60.225   | 8.52e-6  | 4.82e-5 |
| 50  | Robinin                           | 1.052 | 33.550   | 6.34e-4  | 1.03e-3 |
| 51  | Afzelin                           | 1.041 | -12.702  | 3.67e-4  | 6.89e-4 |
| 52  | Kaempferol                        | 1.049 | 20.290   | 5.44e-4  | 9.07e-4 |
| 53  | Genistein                         | 1.053 | -60.036  | 9.91e-6  | 4.95e-5 |
| 54  | Tectorigenin                      | 1.054 | -119.090 | 3.40e-8  | 6.81e-7 |
| 55  | Formononetin                      | 1.053 | -43.176  | 1.46e-5  | 6.32e-5 |
| 56  | Daidzein                          | 0.921 | -3.601   | 0.07     | 0.08    |
| 57  | Calycosin                         | 1.053 | -60.430  | 8.83e-6  | 4.82e-5 |
| 58  | Isomangiferin                     | 1.053 | -50.090  | 2.95e-5  | 9.31e-5 |
