# Supplementary material for: Kaempferitrin: A Flavonoid Marker to Distinguish Camellia oleifera Honey
Source: MDPI journal article supplement (doi:10.3390/nu15020435), 2023-01-14
Supplement: s1 [file s1]

**Table S1.** Standard information for 204 flavonoids.

| No. | Compounds                     | Abbreviations | Classification     |
|-----|-------------------------------|---------------|--------------------|
| 1   | Astilbin                      | Flavonoid_01  | Flavanonols        |
| 2   | Miquelianin                   | Flavonoid_02  | Flavonols          |
| 3   | 4,4-Dimethoxychalcone         | Flavonoid_03  | Chalcones          |
| 4   | Isosilybin                    | Flavonoid_04  | Flavanonols        |
| 5   | 7-Methoxyisoflavone           | Flavonoid_05  | Isoflavanones      |
| 6   | Diosmetin                     | Flavonoid_06  | Flavones           |
| 7   | Troloxerutin                  | Flavonoid_07  | -                  |
| 8   | 5-Methyl-7-methoxyisoflavone  | Flavonoid_08  | Isoflavanones      |
| 9   | Genistein                     | Flavonoid_09  | Isoflavanones      |
| 10  | 3,4-Dihydroxyflavone          | Flavonoid_10  | Flavones           |
| 11  | Hydroxysafflor yellow A       | Flavonoid_11  | -                  |
| 12  | Liquiritigenin                | Flavonoid_12  | Flavanones         |
| 13  | Isoorientin                   | Flavonoid_13  | Flavone glycosides |
| 14  | Nobiletin                     | Flavonoid_14  | Flavones           |
| 15  | Neohesperidin                 | Flavonoid_15  | Flavanones         |
| 17  | 7,4-Di-O-methylapigenin       | Flavonoid_16  | Flavones           |
| 18  | Flavokawain C                 | Flavonoid_17  | Phenonic acids     |
| 19  | Baicalein                     | Flavonoid_18  | Flavones           |
| 20  | beta-Mangostin                | Flavonoid_19  | Xanthones          |
| 21  | Sagittatoside A               | Flavonoid_20  | Flavonols          |
| 22  | Tangeretin                    | Flavonoid_21  | Flavones           |
| 23  | Neohesperidin dihydrochalcone | Flavonoid_22  | Chalcones          |
| 24  | Quercetin                     | Flavonoid_23  | Flavonols          |
| 25  | 4,5-Dihydroxyflavone          | Flavonoid_24  | Flavones           |
| 26  | Apigenin-7-glucuronide        | Flavonoid_25  | Flavones           |
| 27  | Formononetin                  | Flavonoid_26  | Isoflavanones      |
| 28  | Flavonol                      | Flavonoid_27  | Flavonols          |
| 29  | Scutellarin                   | Flavonoid_28  | Flavones           |
| 30  | IKarisoside A                 | Flavonoid_29  | Flavones           |
| 31  | Isoliquiritigenin             | Flavonoid_30  | Chalcones          |
| 32  | Naringin Dihydrochalcone      | Flavonoid_31  | Chalcones          |
| 33  | Daidzin                       | Flavonoid_32  | Isoflavanones      |
| 34  | Oroxin A                      | Flavonoid_33  | Flavones           |
| 35  | Isoginkgetin                  | Flavonoid_34  | Biflavonoids       |
| 36  | Syringaldehyde                | Flavonoid_35  | Phenonic acids     |
| 37  | Icariside I                   | Flavonoid_36  | Flavonols          |
| 38  | Kurarinone                    | Flavonoid_37  | -                  |
| 39  | Corylifol A                   | Flavonoid_38  | Isoflavanones      |
| 40  | Trimethylapigenin             | Flavonoid_39  | Flavones           |
| 41  | Dihydromyricetin              | Flavonoid_40  | Flavanonols        |

Continue for Table S1

| No. | Compounds                         | Abbreviations | Classification     |
|-----|-----------------------------------|---------------|--------------------|
| 42  | Nicotiflorin                      | Flavonoid_42  | Flavones           |
| 43  | Kaempferol                        | Flavonoid_43  | Flavonols          |
| 44  | 4-Hydroxychalcone                 | Flavonoid_44  | Chalcones          |
| 45  | 3,7,4-Trihydroxyflavone           | Flavonoid_45  | Flavonols          |
| 46  | Eupatorin                         | Flavonoid_46  | Flavones           |
| 47  | Ginkgetin                         | Flavonoid_47  | Biflavonoids       |
| 48  | Narirutin                         | Flavonoid_48  | Flavanones         |
| 49  | Baicalin                          | Flavonoid_49  | Flavones           |
| 50  | Luteolin                          | Flavonoid_50  | Flavones           |
| 51  | 3-Methoxypuerarin                 | Flavonoid_51  | Flavone glycosides |
| 52  | Kaempferol 3-neohesperidoside     | Flavonoid_52  | Flavonols          |
| 53  | Cardamonin                        | Flavonoid_53  | Phenonic acids     |
| 54  | Isorhamnetin-3-O-neohesperidoside | Flavonoid_54  | Flavonols          |
| 55  | Catechin                          | Flavonoid_55  | Flavanols          |
| 56  | Taxifolin                         | Flavonoid_56  | Flavanonols        |
| 57  | Rutin                             | Flavonoid_57  | Flavonols          |
| 58  | Isorhamnetin                      | Flavonoid_58  | Flavonols          |
| 59  | Hispidulin                        | Flavonoid_59  | Flavones           |
| 60  | Kushenol A                        | Flavonoid_60  | Other flavonoids   |
| 61  | Chrysin                           | Flavonoid_61  | Flavones           |
| 62  | Methylophiopogonanone B           | Flavonoid_62  | Phenonic acids     |
| 63  | Tectorigenin                      | Flavonoid_63  | Isoflavanones      |
| 64  | Scutellarein                      | Flavonoid_64  | Flavones           |
| 65  | Phlorizin                         | Flavonoid_65  | Chalcones          |
| 66  | Puerarin                          | Flavonoid_66  | Isoflavanones      |
| 67  | Fisetin                           | Flavonoid_67  | Flavonols          |
| 68  | Mangiferin                        | Flavonoid_68  | Xanthones          |
| 69  | Liquiritin                        | Flavonoid_69  | Flavanones         |
| 70  | Licochalcone E                    | Flavonoid_70  | Chalcones          |
| 71  | Galangin                          | Flavonoid_71  | Flavones           |
| 72  | Apigenin                          | Flavonoid_72  | Flavones           |
| 73  | Genistin                          | Flavonoid_73  | Isoflavanones      |
| 74  | Schaftoside                       | Flavonoid_74  | Flavone glycosides |
| 75  | Licochalcone C                    | Flavonoid_75  | Chalcones          |
| 76  | Sakuranetin                       | Flavonoid_76  | Flavones           |
| 77  | Epimedin A                        | Flavonoid_77  | -                  |
| 78  | Eriocitrin                        | Flavonoid_78  | Flavanones         |
| 79  | Ligustroflavone                   | Flavonoid_79  | Phenonic acids     |
| 80  | Gallocatechin gallate             | Flavonoid_80  | Flavanols          |
| 81  | Tricin                            | Flavonoid_81  | Flavones           |
| 82  | Chrysosplenetin                   | Flavonoid_82  | Flavones           |

Continue for Table S1

| No. | Compounds                           | Abbreviations | Classification   |
|-----|-------------------------------------|---------------|------------------|
| 83  | Epmedin C                           | Flavonoid_83  | -                |
| 84  | Epigallocatechin                    | Flavonoid_84  | Flavanols        |
| 85  | Methylnissolin-3-O-glucoside        | Flavonoid_85  | -                |
| 86  | Avicularin                          | Flavonoid_86  | Flavonols        |
| 87  | Noricaritin                         | Flavonoid_87  | Flavonols        |
| 88  | 5-O-Demethylnobiletin               | Flavonoid_88  | Flavones         |
| 89  | Silibinin                           | Flavonoid_89  | Flavanonols      |
| 90  | Cynaroside                          | Flavonoid_90  | Flavones         |
| 91  | Morusin                             | Flavonoid_91  | Other flavonoids |
| 92  | Myricetin                           | Flavonoid_92  | Flavonols        |
| 93  | Bavachin                            | Flavonoid_93  | Flavanones       |
| 94  | Epimedlin B                         | Flavonoid_94  | -                |
| 95  | Calycosin                           | Flavonoid_95  | Isoflavanones    |
| 96  | Calycosin-7-O- $\beta$ -D-glucoside | Flavonoid_96  | Isoflavanones    |
| 97  | Xanthohumol                         | Flavonoid_97  | Chalcones        |
| 98  | Hyperoside                          | Flavonoid_98  | Flavonols        |
| 99  | Acacetin                            | Flavonoid_99  | Flavones         |
| 100 | Sophoraflavanone G                  | Flavonoid_100 | Flavanones       |
| 101 | Hesperidin                          | Flavonoid_101 | Flavanones       |
| 102 | Theaflavin                          | Flavonoid_102 | -                |
| 103 | Scutellarein tetramethyl ether      | Flavonoid_103 | Flavones         |
| 104 | Corylin                             | Flavonoid_104 | Isoflavanones    |
| 105 | Flavokawain A                       | Flavonoid_105 | Phenonic acids   |
| 106 | Typhaneoside                        | Flavonoid_106 | Flavonols        |
| 107 | Wogonin                             | Flavonoid_107 | Flavones         |
| 108 | Pinocembrin                         | Flavonoid_108 | Flavanones       |
| 109 | Deguelin                            | Flavonoid_109 | -                |
| 110 | Kaempferide                         | Flavonoid_110 | Flavonols        |
| 111 | Irisflorentin                       | Flavonoid_111 | Isoflavanones    |
| 112 | Echinatin                           | Flavonoid_112 | Chalcones        |
| 113 | Taxifolin 7-O-rhamnoside            | Flavonoid_113 | Flavanonols      |
| 114 | 6-O-Acetylglycitin                  | Flavonoid_114 | Isoflavanones    |
| 115 | Quercitrin                          | Flavonoid_115 | Flavonols        |
| 116 | 4-O-Methylbavachalcone              | Flavonoid_116 | Chalcones        |
| 117 | Engeletin                           | Flavonoid_117 | Flavanonols      |
| 118 | Narcissin                           | Flavonoid_118 | Flavones         |
| 119 | Astragalin                          | Flavonoid_119 | Flavonols        |
| 120 | Bavachinin                          | Flavonoid_120 | Flavanones       |
| 121 | Licoisoflavone A                    | Flavonoid_121 | Isoflavanones    |
| 122 | 7-Hydroxy-4H-chromen                | Flavonoid_122 | Phenonic acids   |
| 123 | 2-O-Galloylhyperin                  | Flavonoid_123 | Flavonols        |

Continue for Table S1

| No. | Compounds                | Abbreviations | Classification     |
|-----|--------------------------|---------------|--------------------|
| 124 | Silychristin             | Flavonoid_124 | Flavanonols        |
| 125 | Amentoflavone            | Flavonoid_125 | Biflavonoids       |
| 126 | Eriodictyol              | Flavonoid_126 | Flavanones         |
| 127 | Daidzein                 | Flavonoid_127 | Isoflavanones      |
| 128 | 5-Hydroxyflavone         | Flavonoid_128 | Flavones           |
| 129 | Mulberrin                | Flavonoid_129 | Other flavonoids   |
| 130 | Isobavachalcone          | Flavonoid_130 | Chalcones          |
| 131 | Neobavaisoflavone        | Flavonoid_131 | Isoflavanones      |
| 132 | Alpinetin                | Flavonoid_132 | Flavanones         |
| 133 | $\beta$ -Anhydroicaritin | Flavonoid_133 | -                  |
| 134 | Loureirin B              | Flavonoid_134 | Chalcones          |
| 135 | Theaflavin 3-digallate   | Flavonoid_135 | -                  |
| 136 | 6,2-Dihydroxyflavone     | Flavonoid_136 | Flavones           |
| 137 | Tiliroside               | Flavonoid_137 | Flavonols          |
| 138 | Baimaside                | Flavonoid_138 | Flavonols          |
| 139 | Dihydrokaempferol        | Flavonoid_139 | Flavanonols        |
| 140 | Licoflavone A            | Flavonoid_140 | Flavones           |
| 141 | Isosakuranin             | Flavonoid_141 | Flavanones         |
| 142 | Sciadopitysin            | Flavonoid_142 | -                  |
| 143 | Jaceosidin               | Flavonoid_143 | Flavones           |
| 144 | Kavain                   | Flavonoid_144 | Phenonic acids     |
| 145 | Procyanidin B2           | Flavonoid_145 | Anthocyanins       |
| 146 | Icariin                  | Flavonoid_146 | Flavonols          |
| 147 | Epicatechin              | Flavonoid_147 | Flavanols          |
| 148 | Baohuoside I             | Flavonoid_148 | Flavonols          |
| 149 | Farrerol                 | Flavonoid_149 | Flavanones         |
| 150 | Catechin gallate         | Flavonoid_150 | Flavanols          |
| 151 | Sinensetin               | Flavonoid_151 | Flavones           |
| 152 | Ononin                   | Flavonoid_152 | Isoflavanones      |
| 153 | Glycitin                 | Flavonoid_153 | Isoflavanones      |
| 154 | Vitexin                  | Flavonoid_154 | Flavone glycosides |
| 155 | Spinosin                 | Flavonoid_155 | Flavone glycosides |
| 156 | Wogonoside               | Flavonoid_156 | Flavones           |
| 157 | Isomangiferin            | Flavonoid_157 | Xanthones          |
| 158 | Isosakuranetin           | Flavonoid_158 | Flavanones         |
| 159 | Icaritin                 | Flavonoid_159 | Flavonols          |
| 160 | Apigenin 7-glucoside     | Flavonoid_160 | Flavones           |
| 161 | Diosmin                  | Flavonoid_161 | Flavones           |
| 162 | Tectochrysin             | Flavonoid_162 | Flavones           |
| 163 | 4-Hydroxychalcone        | Flavonoid_163 | Chalcones          |
| 164 | 5-Methoxyflavone         | Flavonoid_164 | Flavones           |

Continue for Table S1

| No. | Compounds                                               | Abbreviations | Classification     |
|-----|---------------------------------------------------------|---------------|--------------------|
| 165 | Homoplantagin                                           | Flavonoid_165 | Flavones           |
| 166 | Genkwanin                                               | Flavonoid_166 | Flavones           |
| 167 | Oroxin B                                                | Flavonoid_167 | Flavones           |
| 168 | 5,7,3,4-Tetramethoxyflavone                             | Flavonoid_168 | Flavones           |
| 169 | Quercetin 3-O-(6-galloyl)- $\beta$ -D-galactopyranoside | Flavonoid_169 | Flavonols          |
| 170 | Licoflavonol                                            | Flavonoid_170 | Flavonols          |
| 171 | 6-Hydroxyflavone                                        | Flavonoid_171 | Flavones           |
| 172 | Kaempferitrin                                           | Flavonoid_172 | Flavonols          |
| 173 | 6-Methylflavone                                         | Flavonoid_173 | Flavones           |
| 174 | Glabridin                                               | Flavonoid_174 | Isoflavanones      |
| 175 | Afzelin                                                 | Flavonoid_175 | Flavonols          |
| 176 | Naringenin-7-glucoside                                  | Flavonoid_176 | Flavanones         |
| 177 | Phloretin                                               | Flavonoid_177 | Chalcones          |
| 178 | Myricitrin                                              | Flavonoid_178 | Flavonols          |
| 179 | Poncirin                                                | Flavonoid_179 | Flavanones         |
| 180 | Spiraeoside                                             | Flavonoid_180 | Flavonols          |
| 181 | Demethyltexasin                                         | Flavonoid_181 | Isoflavanones      |
| 182 | 2-Hydroxydaidzein                                       | Flavonoid_182 | Isoflavanones      |
| 183 | 2-Hydroxygenistein                                      | Flavonoid_183 | Isoflavanones      |
| 184 | Afzelechin                                              | Flavonoid_184 | Flavanols          |
| 185 | 3,7-Di-O-methylquercetin                                | Flavonoid_185 | Flavonols          |
| 186 | Prunetin                                                | Flavonoid_186 | Isoflavanones      |
| 187 | Tricetin                                                | Flavonoid_187 | Flavones           |
| 188 | Laricitrin                                              | Flavonoid_188 | Flavonols          |
| 189 | Robinin                                                 | Flavonoid_189 | Flavonols          |
| 190 | 7,4-Dihydroxyflavone                                    | Flavonoid_190 | Flavones           |
| 191 | Naringenin chalcone                                     | Flavonoid_191 | Chalcones          |
| 192 | Orientin                                                | Flavonoid_192 | Flavone glycosides |
| 193 | Hydroxygenkwanin                                        | Flavonoid_193 | Flavones           |
| 194 | Quercimeritrin                                          | Flavonoid_194 | Flavonols          |
| 195 | Gallocatechin                                           | Flavonoid_195 | Flavanols          |
| 196 | Pedalitin                                               | Flavonoid_196 | Flavones           |
| 197 | Isorhamnetin 3-O-glucoside                              | Flavonoid_197 | Flavonols          |
| 198 | 5,7-Dihydroxy-3,4,5-trimethoxyflavone                   | Flavonoid_198 | Flavones           |
| 199 | Persicogenin                                            | Flavonoid_199 | Flavanones         |
| 200 | Benzylideneacetophenone                                 | Flavonoid_200 | Chalcones          |
| 201 | Trilobatin                                              | Flavonoid_201 | Chalcones          |
| 202 | Sieboldin                                               | Flavonoid_202 | Chalcones          |
| 203 | Limocitrin                                              | Flavonoid_203 | Flavones           |
| 204 | Linarin                                                 | Flavonoid_204 | Flavones           |
