# Supplementary material for: Kaempferitrin: A Flavonoid Marker to Distinguish Camellia oleifera Honey
Source: MDPI journal article supplement (doi:10.3390/nu15020435), 2023-01-14
Supplement: s1 [file s1]

**Table S2.** Standard working curve information for 204 flavonoids.

| No. | Abbreviations | RT (min) | Standard curve                 | Regression (R <sup>2</sup> ) |
|-----|---------------|----------|--------------------------------|------------------------------|
| 1   | Flavonoid_01  | 2.97     | $y = 3496.6425 x + 512.9095$   | 0.99007                      |
| 2   | Flavonoid_02  | 2.85     | $y = 15566.5389 x - 7952.2289$ | 0.99596                      |
| 3   | Flavonoid_03  | 9.10     | $y = 1.8179e5 x + 4.5583e4$    | 0.99789                      |
| 4   | Flavonoid_04  | 4.95     | $y = 9620.1576 x - 4121.4954$  | 0.99932                      |
| 5   | Flavonoid_05  | 8.10     | $y = 2.4702e5 x + 5968.1145$   | 0.99962                      |
| 6   | Flavonoid_06  | 5.17     | $y = 7.8518e4 x + 8370.0911$   | 0.99927                      |
| 7   | Flavonoid_07  | 2.73     | $y = 258.2069 x - 454.0186$    | 0.99460                      |
| 8   | Flavonoid_08  | 9.83     | $y = 6.8149e5 x + 4.3722e5$    | 0.99306                      |
| 9   | Flavonoid_09  | 4.99     | $y = 9046.9851 x - 3748.2249$  | 0.99223                      |
| 10  | Flavonoid_10  | 5.73     | $y = 21428.8169 x - 153.4533$  | 0.99924                      |
| 11  | Flavonoid_11  | 2.05     | $y = 1656.7983 x + 55.3182$    | 0.99895                      |
| 12  | Flavonoid_12  | 4.12     | $y = 3.5146e4 x - 193.9155$    | 0.99849                      |
| 13  | Flavonoid_13  | 2.53     | $y = 21612.7810 x + 1593.0357$ | 0.99559                      |
| 14  | Flavonoid_14  | 7.03     | $y = 4.8686e5 x + 1.8587e5$    | 0.99868                      |
| 15  | Flavonoid_15  | 3.22     | $y = 4.2470e4 x + 7952.8170$   | 0.99753                      |
| 17  | Flavonoid_16  | 9.64     | $y = 1.4324e5 x + 3.3677e4$    | 0.99979                      |
| 18  | Flavonoid_17  | 8.21     | $y = 8.04700e4 x + 4983.8891$  | 0.99991                      |
| 19  | Flavonoid_18  | 5.40     | $y = 19255.8306 x + 8918.3731$ | 0.99913                      |
| 20  | Flavonoid_19  | 13.43    | $y = 2743.1525 x + 1412.01110$ | 0.99792                      |
| 21  | Flavonoid_20  | 6.08     | $y = 19712.9185 x + 1238.1521$ | 0.99845                      |
| 22  | Flavonoid_21  | 7.81     | $y = 4.3129e5 x + 6.2743e4$    | 0.99993                      |
| 23  | Flavonoid_22  | 3.63     | $y = 5.4161e4 x - 25583.9823$  | 0.99822                      |
| 24  | Flavonoid_23  | 4.24     | $y = 18188.4376 x - 8997.4175$ | 0.99903                      |
| 25  | Flavonoid_24  | 6.85     | $y = 29093.8624 x + 4773.1787$ | 0.99963                      |
| 26  | Flavonoid_25  | 3.16     | $y = 7800.5024 x - 16561.6743$ | 0.99917                      |
| 27  | Flavonoid_26  | 5.93     | $y = 1.0968e5 x + 5697.1219$   | 0.99967                      |
| 28  | Flavonoid_27  | 8.27     | $y = 7831.4471 x - 8019.8193$  | 0.99894                      |
| 29  | Flavonoid_28  | 2.85     | $y = 4213.0199 x + 1709.4104$  | 0.99620                      |
| 30  | Flavonoid_29  | 5.59     | $y = 3.1863e4 x - 1500.0051$   | 0.99924                      |
| 31  | Flavonoid_30  | 5.68     | $y = 4.9050e4 x + 3632.9299$   | 0.99966                      |
| 32  | Flavonoid_31  | 3.41     | $y = 3.1760e4 x - 13073.3038$  | 0.99622                      |
| 33  | Flavonoid_32  | 2.59     | $y = 4095.6830 x + 3459.5859$  | 0.99648                      |
| 34  | Flavonoid_33  | 3.55     | $y = 5608.1314 x - 4688.8779$  | 0.99904                      |
| 35  | Flavonoid_34  | 8.38     | $y = 3.7136e4 x + 18451.6057$  | 0.99922                      |
| 36  | Flavonoid_35  | 3.10     | $y = 668.9319 x + 6033.7250$   | 0.99919                      |
| 37  | Flavonoid_36  | 6.42     | $y = 5190.6629 x - 2131.6717$  | 0.99433                      |
| 38  | Flavonoid_37  | 7.24     | $y = 14140.9256 x - 2421.0231$ | 0.99836                      |
| 39  | Flavonoid_38  | 10.18    | $y = 15218.5618 x + 1937.5978$ | 0.99923                      |
| 40  | Flavonoid_39  | 6.73     | $y = 2.6073e5 x + 3.9574e4$    | 0.99950                      |
| 41  | Flavonoid_40  | 2.64     | $y = 4287.1949 x - 331.8465$   | 0.99729                      |

Continue for Table S2

| No. | Abbreviations | RT (min) | Standard curve                  | Regression (R <sup>2</sup> ) |
|-----|---------------|----------|---------------------------------|------------------------------|
| 42  | Flavonoid_42  | 2.91     | $y = 25483.9708 x - 11416.3105$ | 0.99713                      |
| 43  | Flavonoid_43  | 5.09     | $y = 1552.7710 x + 952.1216$    | 0.99882                      |
| 44  | Flavonoid_44  | 6.74     | $y = 26114.5130 x + 2963.7406$  | 0.99979                      |
| 45  | Flavonoid_45  | 4.16     | $y = 209.8973 x + 2426.8721$    | 0.99805                      |
| 46  | Flavonoid_46  | 6.49     | $y = 8.3511e4 x + 824.9585$     | 0.99984                      |
| 47  | Flavonoid_47  | 8.18     | $y = 4.02990e4 x + 17623.1355$  | 0.99906                      |
| 48  | Flavonoid_48  | 2.97     | $y = 16247.2283 x - 1296.1706$  | 0.99980                      |
| 49  | Flavonoid_49  | 3.52     | $y = 3023.0384 x + 5882.7964$   | 0.99507                      |
| 50  | Flavonoid_50  | 4.19     | $y = 18298.5057 x + 3741.6848$  | 0.99948                      |
| 51  | Flavonoid_51  | 2.37     | $y = 15023.4567 x + 2622.0209$  | 0.99943                      |
| 52  | Flavonoid_52  | 2.77     | $y = 17028.0635 x - 2318.0944$  | 0.99930                      |
| 53  | Flavonoid_53  | 8.46     | $y = 17251.4617 x + 462.6047$   | 0.99851                      |
| 54  | Flavonoid_54  | 2.80     | $y = 4.2203e4 x + 845.4219$     | 0.99987                      |
| 55  | Flavonoid_55  | 2.21     | $y = 1442.9940 x + 389.6780$    | 0.99934                      |
| 56  | Flavonoid_56  | 3.13     | $y = 6293.8263 x - 22503.4148$  | 0.99804                      |
| 57  | Flavonoid_57  | 2.72     | $y = 4.0151e4 x - 11812.4468$   | 0.99699                      |
| 58  | Flavonoid_58  | 5.26     | $y = 3.4376e4 x + 1499.0156$    | 0.99855                      |
| 59  | Flavonoid_59  | 5.08     | $y = 4642.13674 x + 3737.0140$  | 0.99827                      |
| 60  | Flavonoid_60  | 10.97    | $y = 7.0704e4 x + 12165.5237$   | 0.99860                      |
| 61  | Flavonoid_61  | 6.93     | $y = 6722.5720 x - 32.1165$     | 0.99988                      |
| 62  | Flavonoid_62  | 9.80     | $y = 16841.9008x - 616.9100$    | 0.99970                      |
| 63  | Flavonoid_63  | 5.09     | $y = 4987.6840 x + 10571.6284$  | 0.99745                      |
| 64  | Flavonoid_64  | 3.71     | $y = 4277.3330 x + 11537.6571$  | 0.99542                      |
| 65  | Flavonoid_65  | 3.35     | $y = 8462.7319 x - 2785.6658$   | 0.99181                      |
| 66  | Flavonoid_66  | 2.30     | $y = 3.7444e4 x + 10111.0570$   | 0.99969                      |
| 67  | Flavonoid_67  | 3.49     | $y = 8525.5565 x + 28036.6841$  | 0.99271                      |
| 68  | Flavonoid_68  | 2.30     | $y = 14312.7021 x - 487.9446$   | 0.99977                      |
| 69  | Flavonoid_69  | 2.87     | $y = 24506.1452 x + 4609.2442$  | 0.99897                      |
| 70  | Flavonoid_70  | 7.83     | $y = 15622.5086 x + 4433.0085$  | 0.99851                      |
| 71  | Flavonoid_71  | 7.20     | $y = 1762.7511 x + 444.8389$    | 0.99804                      |
| 72  | Flavonoid_72  | 4.93     | $y = 12713.8853 x - 756.1911$   | 0.99986                      |
| 73  | Flavonoid_73  | 2.97     | $y = 2886.7319 x + 11091.6526$  | 0.99707                      |
| 74  | Flavonoid_74  | 2.47     | $y = 4738.7632 x - 2050.6350$   | 0.99502                      |
| 75  | Flavonoid_75  | 8.06     | $y = 14435.7306 x + 3782.6976$  | 0.99939                      |
| 76  | Flavonoid_76  | 7.01     | $y = 4.4036e4 x + 1133.7363$    | 0.99993                      |
| 77  | Flavonoid_77  | 3.70     | $y = 72.3503 x - 1078.2661$     | 0.99338                      |
| 78  | Flavonoid_78  | 2.71     | $y = 17532.8915 x - 1799.4911$  | 0.99780                      |
| 79  | Flavonoid_79  | 2.80     | $y = 10061.7419 x + 923.3292$   | 0.99535                      |
| 80  | Flavonoid_80  | 2.56     | $y = 789.1705 x + 418.2928$     | 0.99061                      |
| 81  | Flavonoid_81  | 3.95     | $y = 3.2862e4 x + 8.3014e4$     | 0.99729                      |
| 82  | Flavonoid_82  | 6.97     | $y = 3.9732e4 x + 2404.5215$    | 0.99984                      |

Continue for Table S2

| No. | Abbreviations | RT (min) | Standard curve                 | Regression (R <sup>2</sup> ) |
|-----|---------------|----------|--------------------------------|------------------------------|
| 83  | Flavonoid_83  | 3.88     | $y = 87.6350 x + 211.7865$     | 0.99174                      |
| 84  | Flavonoid_84  | 1.97     | $y = 3591.0249 x + 4181.9997$  | 0.99879                      |
| 85  | Flavonoid_85  | 3.89     | $y = 147.0537 x + 5794.8446$   | 0.99421                      |
| 86  | Flavonoid_86  | 3.07     | $y = 4.4075e4 x - 17715.6410$  | 0.99611                      |
| 87  | Flavonoid_87  | 9.61     | $y = 3.9667e4 x + 22551.2305$  | 0.99916                      |
| 88  | Flavonoid_88  | 8.57     | $y = 1.6049e5 x + 10052.0355$  | 0.99974                      |
| 89  | Flavonoid_89  | 4.68     | $y = 3234.2959 x - 321.5477$   | 0.99921                      |
| 90  | Flavonoid_90  | 2.86     | $y = 25915.2794 x + 2751.5377$ | 0.99813                      |
| 91  | Flavonoid_91  | 11.01    | $y = 29016.1215 x + 136.9777$  | 0.99989                      |
| 92  | Flavonoid_92  | 3.47     | $y = 16340.2616 x - 3.9525e4$  | 0.99813                      |
| 93  | Flavonoid_93  | 7.63     | $y = 5.9771e4 x + 9815.2687$   | 0.99903                      |
| 94  | Flavonoid_94  | 3.78     | $y = 12.8920 x - 134.0203$     | 0.99025                      |
| 95  | Flavonoid_95  | 4.27     | $y = 4.6110e4 x + 392.5080$    | 0.99987                      |
| 96  | Flavonoid_96  | 2.78     | $y = 142.9436 x + 2283.4508$   | 0.99286                      |
| 97  | Flavonoid_97  | 9.57     | $y = 24333.3338 x + 2883.8791$ | 0.99915                      |
| 98  | Flavonoid_98  | 2.83     | $y = 38.7985 x + 1611.9214$    | 0.99545                      |
| 99  | Flavonoid_99  | 7.02     | $y = 6.2917e4 x + 12334.0999$  | 0.99954                      |
| 100 | Flavonoid_100 | 8.55     | $y = 4.2756e4 x + 1737.9514$   | 0.99995                      |
| 101 | Flavonoid_101 | 3.12     | $y = 14216.8125 x - 587.2457$  | 0.99899                      |
| 102 | Flavonoid_102 | 3.67     | $y = 177.1754 x + 49.4876$     | 0.99772                      |
| 103 | Flavonoid_103 | 7.08     | $y = 6.8445e5 x + 8.0731e4$    | 0.99853                      |
| 104 | Flavonoid_104 | 8.33     | $y = 29974.3474 x + 1419.3770$ | 0.99979                      |
| 105 | Flavonoid_105 | 10.76    | $y = 4.3173e5 x + 1.6250e5$    | 0.99770                      |
| 106 | Flavonoid_106 | 2.60     | $y = 7746.6929 x - 1832.8736$  | 0.99957                      |
| 107 | Flavonoid_107 | 6.89     | $y = 2745.1701 x + 349.6255$   | 0.99948                      |
| 108 | Flavonoid_108 | 7.13     | $y = 4479.6896 x + 1063.0917$  | 0.99864                      |
| 109 | Flavonoid_109 | 9.42     | $y = 9848.8467 x + 29416.7906$ | 0.99644                      |
| 110 | Flavonoid_110 | 7.27     | $y = 1.0256e5 x + 15868.5305$  | 0.99986                      |
| 111 | Flavonoid_111 | 6.70     | $y = 4.6085e5 x + 9.0346e4$    | 0.99771                      |
| 112 | Flavonoid_112 | 4.88     | $y = 6261.7302 x + 10223.4224$ | 0.99744                      |
| 113 | Flavonoid_113 | 2.64     | $y = 553.4538 x - 3904.9460$   | 0.99182                      |
| 114 | Flavonoid_114 | 3.28     | $y = 5187.8839 x - 62.5617$    | 0.99864                      |
| 115 | Flavonoid_115 | 3.11     | $y = 17884.2952 x - 7175.7811$ | 0.99512                      |
| 116 | Flavonoid_116 | 11.20    | $y = 1.9620e5 x + 5.7424e4$    | 0.99924                      |
| 117 | Flavonoid_117 | 3.24     | $y = 6253.9626 x - 1655.7401$  | 0.99929                      |
| 118 | Flavonoid_118 | 2.94     | $y = 24285.2218 x - 5030.4943$ | 0.99884                      |
| 119 | Flavonoid_119 | 3.07     | $y = 26569.6166 x + 5206.1622$ | 0.99800                      |
| 120 | Flavonoid_120 | 9.87     | $y = 3.3749e4 x - 854.9501$    | 0.99958                      |
| 121 | Flavonoid_121 | 8.04     | $y = 3.4053e4 x + 1881.2384$   | 0.99998                      |
| 122 | Flavonoid_122 | 2.66     | $y = 2680.2740 x + 1584.7526$  | 0.99873                      |
| 123 | Flavonoid_123 | 2.84     | $y = 17627.9112 x - 9.6075e4$  | 0.99000                      |

Continue for Table S2

| No. | Abbreviations | RT (min) | Standard curve                 | Regression (R <sup>2</sup> ) |
|-----|---------------|----------|--------------------------------|------------------------------|
| 124 | Flavonoid_124 | 3.68     | $y = 5751.2597 x - 917.6386$   | 0.99971                      |
| 125 | Flavonoid_125 | 5.63     | $y = 4.1680e4 x + 6499.9719$   | 0.99932                      |
| 126 | Flavonoid_126 | 4.15     | $y = 4550.5671 x - 1734.3066$  | 0.99933                      |
| 127 | Flavonoid_127 | 3.97     | $y = 0.0366 x + 0.0071$        | 0.99949                      |
| 128 | Flavonoid_128 | 9.31     | $y = 7.1911e4 x + 3.0214e4$    | 0.99918                      |
| 129 | Flavonoid_129 | 8.76     | $y = 5.3015e4 x + 4159.3912$   | 0.99959                      |
| 130 | Flavonoid_130 | 9.46     | $y = 4.5846e4 x + 6754.1625$   | 0.99968                      |
| 131 | Flavonoid_131 | 7.28     | $y = 5.4005e4 x + 3323.0636$   | 0.99970                      |
| 132 | Flavonoid_132 | 5.21     | $y = 6070.8165 x + 757.1672$   | 0.99984                      |
| 133 | Flavonoid_133 | 12.00    | $y = 1.9707e5 x + 2.1048e5$    | 0.99948                      |
| 134 | Flavonoid_134 | 7.31     | $y = 13086.4389 x + 7698.2012$ | 0.99944                      |
| 135 | Flavonoid_135 | 3.88     | $y = 221.9623 x - 5295.0801$   | 0.99470                      |
| 136 | Flavonoid_136 | 4.75     | $y = 14406.2430 x + 1272.7275$ | 0.99992                      |
| 137 | Flavonoid_137 | 3.97     | $y = 5.0752e4 x - 5741.6665$   | 0.99954                      |
| 138 | Flavonoid_138 | 2.48     | $y = 3.0130e4 x - 9294.5188$   | 0.99932                      |
| 139 | Flavonoid_139 | 3.61     | $y = 10291.9122 x - 1862.6917$ | 0.99948                      |
| 140 | Flavonoid_140 | 6.82     | $y = 28042.8267 x + 2792.4557$ | 0.99976                      |
| 141 | Flavonoid_141 | 4.45     | $y = 13145.8754 x - 2461.0180$ | 0.99910                      |
| 142 | Flavonoid_142 | 10.33    | $y = 3.7666e4 x + 18470.1659$  | 0.99921                      |
| 143 | Flavonoid_143 | 5.28     | $y = 3.4733e4 x - 327.8250$    | 0.99944                      |
| 144 | Flavonoid_144 | 6.62     | $y = 5.2859e4 x + 18532.5754$  | 0.99870                      |
| 145 | Flavonoid_145 | 2.27     | $y = 568.7046 x + 34.0869$     | 0.99888                      |
| 146 | Flavonoid_146 | 4.09     | $y = 16.3733 x + 181.8778$     | 0.99858                      |
| 147 | Flavonoid_147 | 2.45     | $y = 2459.5207 x - 1253.0410$  | 0.99937                      |
| 148 | Flavonoid_148 | 7.10     | $y = 9.3466e4 x + 2201.7367$   | 0.99995                      |
| 149 | Flavonoid_149 | 6.58     | $y = 13943.2656 x + 438.9954$  | 0.99994                      |
| 150 | Flavonoid_150 | 2.91     | $y = 4963.9097 x - 1886.7672$  | 0.99644                      |
| 151 | Flavonoid_151 | 6.30     | $y = 7.5518e5 x + 8.6712e4$    | 0.99941                      |
| 152 | Flavonoid_152 | 3.62     | $y = 202.2768 x + 243.7588$    | 0.99171                      |
| 153 | Flavonoid_153 | 2.62     | $y = 400.6695 x + 176.4194$    | 0.99492                      |
| 154 | Flavonoid_154 | 2.78     | $y = 5.6954e4 x - 12486.3815$  | 0.99727                      |
| 155 | Flavonoid_155 | 2.67     | $y = 2803.4094 x + 330.4011$   | 0.99967                      |
| 156 | Flavonoid_156 | 4.27     | $y = 1184.1218 x - 313.9026$   | 0.99505                      |
| 157 | Flavonoid_157 | 2.37     | $y = 25379.6696 x - 1483.7026$ | 0.99987                      |
| 158 | Flavonoid_158 | 7.06     | $y = 13003.7984 x + 121.1500$  | 0.99977                      |
| 159 | Flavonoid_159 | 10.51    | $y = 11171.7878 x + 3435.8948$ | 0.99851                      |
| 160 | Flavonoid_160 | 3.14     | $y = 26692.1834 x + 1095.2639$ | 0.99891                      |
| 161 | Flavonoid_161 | 3.05     | $y = 3.7054e4 x - 4780.7855$   | 0.99920                      |
| 162 | Flavonoid_162 | 9.58     | $y = 1.9862e5 x + 11346.8220$  | 0.99970                      |
| 163 | Flavonoid_163 | 6.87     | $y = 6094.8884 x + 2582.3638$  | 0.99949                      |
| 164 | Flavonoid_164 | 6.43     | $y = 1.7239e5 x + 7.5198e5$    | 0.99278                      |

Continue for Table S2

| No. | Abbreviations | RT (min) | Standard curve                  | Regression (R <sup>2</sup> ) |
|-----|---------------|----------|---------------------------------|------------------------------|
| 165 | Flavonoid_165 | 3.20     | $y = 4.6409e4 x + 3024.2730$    | 0.99942                      |
| 166 | Flavonoid_166 | 7.14     | $y = 5.1250e4 x + 14648.2227$   | 0.99953                      |
| 167 | Flavonoid_167 | 3.03     | $y = 2756.4724 x + 1589.6321$   | 0.99470                      |
| 168 | Flavonoid_168 | 5.96     | $y = 9.0055e5 x + 4.6388e5$     | 0.99618                      |
| 169 | Flavonoid_169 | 2.70     | $y = 18533.0814 x - 1994.8434$  | 0.99962                      |
| 170 | Flavonoid_170 | 8.93     | $y = 9817.4055 x + 986.4704$    | 0.99924                      |
| 171 | Flavonoid_171 | 5.84     | $y = 16500.9343 x + 8401.6272$  | 0.99918                      |
| 172 | Flavonoid_172 | 2.82     | $y = 10383.8424 x + 1676.5839$  | 0.99892                      |
| 173 | Flavonoid_173 | 8.54     | $y = 1.8127e5 x + 6.1977e4$     | 0.99807                      |
| 174 | Flavonoid_174 | 8.77     | $y = 3.0902e4 x + 5192.9354$    | 0.99978                      |
| 175 | Flavonoid_175 | 3.42     | $y = 3.3583e4 x + 3299.0459$    | 0.99788                      |
| 176 | Flavonoid_176 | 3.20     | $y = 2477.6624 x + 9678.2655$   | 0.99897                      |
| 177 | Flavonoid_177 | 4.87     | $y = 4.7778e4 x - 9920.0653$    | 0.99930                      |
| 178 | Flavonoid_178 | 2.81     | $y = 2884.4000 x - 13159.8870$  | 0.99424                      |
| 179 | Flavonoid_179 | 4.05     | $y = 5.5284e4 x - 16385.3707$   | 0.99861                      |
| 180 | Flavonoid_180 | 3.15     | $y = 3.2279e4 x - 6831.9510$    | 0.99765                      |
| 181 | Flavonoid_181 | 3.45     | $y = 4471.4799 x - 3738.1077$   | 0.99815                      |
| 182 | Flavonoid_182 | 3.51     | $y = 21986.6748 x + 9881.9627$  | 0.99944                      |
| 183 | Flavonoid_183 | 4.03     | $y = 27073.6971 x + 7065.4897$  | 0.99891                      |
| 184 | Flavonoid_184 | 2.57     | $y = 3410.5695 x - 1499.5637$   | 0.99867                      |
| 185 | Flavonoid_185 | 6.45     | $y = 1.4866e5 x + 28357.5354$   | 0.99985                      |
| 186 | Flavonoid_186 | 7.30     | $y = 12965.8656 x + 2646.0875$  | 0.99887                      |
| 187 | Flavonoid_187 | 3.51     | $y = 3.5976e4 x - 8072.6614$    | 0.99900                      |
| 188 | Flavonoid_188 | 4.24     | $y = 17620.5564 x + 4459.8258$  | 0.99964                      |
| 189 | Flavonoid_189 | 2.48     | $y = 13417.3324 x - 4.6589e4$   | 0.99504                      |
| 190 | Flavonoid_190 | 3.73     | $y = 12762.3978 x + 9359.7886$  | 0.99850                      |
| 191 | Flavonoid_191 | 4.94     | $y = 16752.6144 x + 4002.3187$  | 0.99945                      |
| 192 | Flavonoid_192 | 2.61     | $y = 20236.5879 x - 10551.1954$ | 0.99251                      |
| 193 | Flavonoid_193 | 6.04     | $y = 29989.4143 x + 10415.5252$ | 0.99949                      |
| 194 | Flavonoid_194 | 2.81     | $y = 1262.6683 x + 3665.5675$   | 0.99603                      |
| 195 | Flavonoid_195 | 1.52     | $y = 4516.0333 x - 759.3914$    | 0.99918                      |
| 196 | Flavonoid_196 | 3.69     | $y = 5.6989e4 x + 2839.3927$    | 0.99953                      |
| 197 | Flavonoid_197 | 3.10     | $y = 29069.3649 x - 4466.4270$  | 0.99574                      |
| 198 | Flavonoid_198 | 6.74     | $y = 6.6015e4 x + 20497.3341$   | 0.99762                      |
| 199 | Flavonoid_199 | 7.30     | $y = 812.0470 x - 2050.1988$    | 0.99902                      |
| 200 | Flavonoid_200 | 9.37     | $y = 8.7260e4 x + 16781.7642$   | 0.99990                      |
| 201 | Flavonoid_201 | 3.58     | $y = 28836.7559 x - 6991.5993$  | 0.99802                      |
| 202 | Flavonoid_202 | 3.11     | $y = 5261.1022 x - 4988.7514$   | 0.99246                      |
| 203 | Flavonoid_203 | 3.79     | $y = 2306.0507 x - 3624.5203$   | 0.99957                      |
| 204 | Flavonoid_204 | 3.79     | $y = 35.2656 x - 581.2067$      | 0.99245                      |
